# Supplementary figures and images for: A DFT study on the mechanism of HCl and CO2 capture by CaO
Source: Royal Society of Chemistry journal article supplement (doi:10.1039/d1re00487e), 2021-12-21

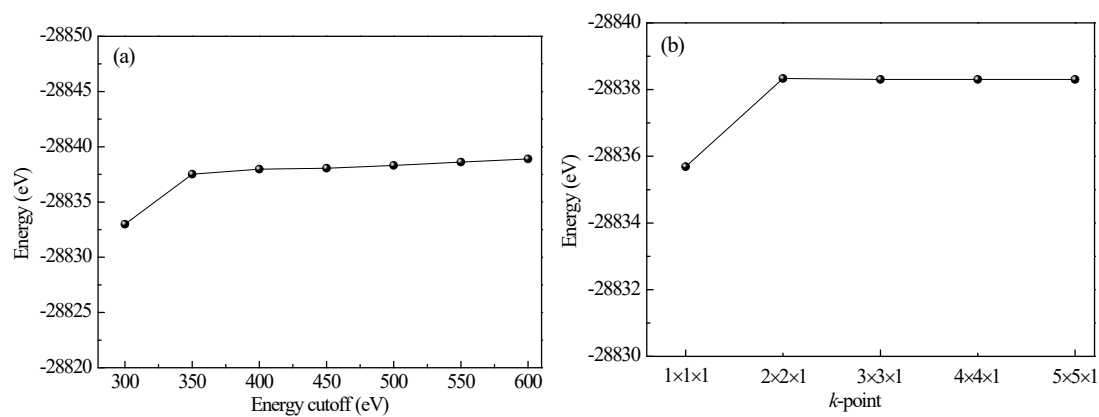

**Fig. S1.** Variation in energy of CaO (100) surface as a function of energy cutoff (a) and *k*-point (b).

Supplement: d1re00487e1.pdf [file d1re00487e1.pdf]
